# Supplementary material for: Laser ignition of energetic complexes: impact of metal ion on laser initiation ability
Source: Royal Society of Chemistry journal article supplement (doi:10.1039/d1nj02345d), 2021-01-01
Supplement: d1nj02345d1.pdf [file d1nj02345d1.pdf]

## **Laser Ignition of Energetic Complexes: Impact of Metal Ion on Laser Initiation Ability**

Yu Wang<sup>†</sup>, Siyu Xu<sup>‡</sup>, Heng Li<sup>‡</sup>, Haixia Ma<sup>†,\*</sup>, Yazhou Zhang<sup>†</sup>, Zhaoqi Guo<sup>†,\*</sup>

<sup>†</sup>School of Chemical Engineering / Xi'an Key Laboratory of Special Energy Materials, Northwest University, Xi'an 710069, Shaanxi, P. R. China.

<sup>‡</sup>Xi'an Modern Chemistry Research Institute, Xi'an 710065, Shaanxi, P. R. China.

**Submitted to the New Journal of Chemistry**

### **Table of Contents**

- 1. General methods.**
- 2. Hydrogen bonds for 1, 3, 4 and 5. (Table S1–S4)**
- 3. Bond lengths (Å) and angles (°) for 1, 3, 4 and 5. (Table S5–S8)**
- 4. Composition of detonation products of complexes 1, 3, 4 and 5. (Table S9–S12)**
- 5. Snap shots of laser initiation experiments. (Fig. S1–S5)**
- 6. Detailed calculation of enthalpies of formation. (Table S13)**
- 7. References.**

## 1. General methods.

Sulfuric acid and potassium nitrate were purchased from Sinopharm Chemical Reagent. Other reagents were bought from Energy Chemical and used without further purification. Thermogravimetric analysis (TGA) and differential scanning calorimetry (DSC) were measured on DSC-Q2000 and SDT-Q600. Impact sensitivities (IS) were measured on a home-made device according to the UN Recommendations on the Transport of Dangerous Goods, Manual of Tests and Criteria. Single-crystal X-ray diffraction patterns of complexes **1**, **3**, **4** and **5** were recorded on a Bruker APEX-II diffractometer with highly oriented graphite crystal monochromated GaK $\alpha$  radiation ( $\lambda = 1.34138$  nm). Semi-empirical absorption corrections were applied using the SADABS program. The structures were solved by direct methods and refined by full-matrix least-squares techniques based on  $F^2$ . All the atoms were refined anisotropically. The CCDC numbers of **1**, **3**, **4** and **5** are 2036169, 2036170, 2036173 and 2036174.

## 2. Hydrogen bonds for **1**, **3**, **4** and **5**.

**Table S1** Hydrogen bonds present in **1**

| D–H $\cdots$ A                      | d(D–H)/Å | d(H–A)/Å | d(D–A)/Å | D–H–A/ $^\circ$ |
|-------------------------------------|----------|----------|----------|-----------------|
| O10–H10A $\cdots$ O1 <sup>i</sup>   | 0.806    | 2.242    | 2.964    | 149.38          |
| O10–H10A $\cdots$ O2 <sup>i</sup>   | 0.806    | 2.602    | 3.033    | 115.16          |
| O9–H9A $\cdots$ N4                  | 0.821    | 2.022    | 2.827    | 166.41          |
| O9–H9B $\cdots$ O4 <sup>ii</sup>    | 0.851    | 2.292    | 3.048    | 148.02          |
| O10–H10A $\cdots$ O7 <sup>iii</sup> | 0.879    | 2.274    | 3.078    | 152.04          |

Symmetry codes: (i)  $x, y, z+1$ ; (ii)  $x+1, y-1, z$ ; (iii)  $x-1, y+1, z$ ; (iv)  $x+1, -y+1/2, z-1/2$ ; (v)  $-x+1, -y+1, -z+1$ ; (vi)  $-x+1, -y, -z+1$ ; (vii)  $-x+1/2, y-1/2, z$ ; (viii)  $x+1/2, -y+3/2, -z+1$ ; (ix)  $x+1/2, y, -z+1/2$ ; (x)  $-x+1, y-1/2, -z+1/2$ ; (xi)  $-x+1, -y+2, -z+1$ ; (xii)  $x, y+1, z$ ; (xiii)  $x+1, y, z$ ; (xiv)  $-x+1, y+1/2, -z+1/2$ ; (xv)  $x+1, -y+3/2, z-1/2$ ; (xvi)  $-x+2, -y+1, -z$ ; (xvii)  $x-1, y, z$ .

**Table S2** Hydrogen bonds present in **3**

| D–H $\cdots$ A                   | d(D–H)/Å | d(H–A)/Å | d(D–A)/Å | D–H–A/ $^\circ$ |
|----------------------------------|----------|----------|----------|-----------------|
| O6–H6A $\cdots$ O4 <sup>iv</sup> | 0.794    | 2.170    | 2.957    | 171.03          |
| O5–H5A $\cdots$ O3 <sup>iv</sup> | 0.784    | 2.471    | 2.916    | 117.44          |
| O5–H5A $\cdots$ N2 <sup>v</sup>  | 0.834    | 1.963    | 2.789    | 170.37          |
| O6–H6B $\cdots$ O1 <sup>vi</sup> | 0.759    | 2.287    | 3.008    | 159.09          |

Symmetry codes: (i)  $x, y, z+1$ ; (ii)  $x+1, y-1, z$ ; (iii)  $x-1, y+1, z$ ; (iv)  $x+1, -y+1/2, z-1/2$ ; (v)  $-x+1, -y+1, -z+1$ ; (vi)  $-x+1, -y, -z+1$ ; (vii)  $-x+1/2, y-1/2, z$ ; (viii)  $x+1/2, -y+3/2, -z+1$ ; (ix)  $x+1/2, y, -z+1/2$ ; (x)  $-x+1, y-1/2, -z+1/2$ ; (xi)  $-x+1, -y+2, -z+1$ ; (xii)  $x, y+1, z$ ; (xiii)  $x+1, y, z$ ; (xiv)  $-x+1, y+1/2, -z+1/2$ ; (xv)  $x+1, -y+3/2, z-1/2$ ; (xvi)  $-x+2, -y+1, -z$ ; (xvii)  $x-1, y, z$ .

**Table S3** Hydrogen bonds present in **4**

| D–H $\cdots$ A | d(D–H)/Å | d(H–A)/Å | d(D–A)/Å | D–H–A/ $^\circ$ |
|----------------|----------|----------|----------|-----------------|
|----------------|----------|----------|----------|-----------------|

|                               |       |       |       |        |
|-------------------------------|-------|-------|-------|--------|
| O13–H13A···N2 <sup>vii</sup>  | 0.906 | 1.970 | 2.827 | 157.09 |
| O13–H13B···O4 <sup>vii</sup>  | 0.905 | 2.255 | 2.964 | 134.87 |
| O13–H13B···O1                 | 0.905 | 2.504 | 3.161 | 129.85 |
| O14–H14A···O4 <sup>vii</sup>  | 0.975 | 2.637 | 3.525 | 151.50 |
| O14–H14A···N2 <sup>vii</sup>  | 0.975 | 1.898 | 2.655 | 132.41 |
| O11–H11A···O4 <sup>viii</sup> | 0.890 | 2.389 | 2.885 | 115.42 |
| O11–H11B···O15                | 0.889 | 1.845 | 2.714 | 165.19 |
| O10–H10A···O16                | 0.919 | 1.855 | 2.745 | 162.52 |
| O10–H10B···O8                 | 0.923 | 2.414 | 3.103 | 131.40 |
| O10–H10B···O5 <sup>ix</sup>   | 0.923 | 2.250 | 2.923 | 129.30 |
| O12–H12B···O8 <sup>x</sup>    | 0.883 | 2.449 | 3.159 | 137.78 |
| O9–H9A···O2 <sup>xi</sup>     | 0.946 | 2.020 | 2.944 | 165.00 |
| O9–H9B···O13 <sup>xii</sup>   | 0.942 | 1.880 | 2.744 | 151.32 |
| O9–H9B···O14 <sup>xii</sup>   | 0.942 | 2.053 | 2.897 | 148.34 |

Symmetry codes: (i)  $x, y, z+1$ ; (ii)  $x+1, y-1, z$ ; (iii)  $x-1, y+1, z$ ; (iv)  $x+1, -y+1/2, z-1/2$ ; (v)  $-x+1, -y+1, -z+1$ ; (vi)  $-x+1, -y, -z+1$ ; (vii)  $-x+1/2, y-1/2, z$ ; (viii)  $x+1/2, -y+3/2, -z+1$ ; (ix)  $x+1/2, y, -z+1/2$ ; (x)  $-x+1, y-1/2, -z+1/2$ ; (xi)  $-x+1, -y+2, -z+1$ ; (xii)  $x, y+1, z$ ; (xiii)  $x+1, y, z$ ; (xiv)  $-x+1, y+1/2, -z+1/2$ ; (xv)  $x+1, -y+3/2, z-1/2$ ; (xvi)  $-x+2, -y+1, -z$ ; (xvii)  $x-1, y, z$ .

**Table S4** Hydrogen bonds present in **5**

| D–H···A                       | d(D–H)/Å | d(H–A)/Å | d(D–A)/Å | D–H–A/° |
|-------------------------------|----------|----------|----------|---------|
| O10–H10A···O4 <sup>xiii</sup> | 0.867    | 2.603    | 3.097    | 117.20  |
| O10–H10A···O3 <sup>xiii</sup> | 0.867    | 2.428    | 3.279    | 167.57  |
| O10–H10A···N6 <sup>xiii</sup> | 0.867    | 2.249    | 2.949    | 137.73  |
| O10–H10B···O5 <sup>xiv</sup>  | 0.867    | 2.135    | 2.978    | 163.81  |
| O9–H9A···O8                   | 0.855    | 2.394    | 3.097    | 139.86  |
| O9–H9B···O3 <sup>xv</sup>     | 0.854    | 2.476    | 3.066    | 126.90  |
| O9–H9B···O7 <sup>xvi</sup>    | 0.854    | 2.510    | 3.098    | 126.79  |
| O11–H11A···O5                 | 0.959    | 2.583    | 3.107    | 114.63  |
| O11–H11A···N3                 | 0.959    | 1.838    | 2.782    | 167.63  |
| O11–H11B···O8 <sup>xvii</sup> | 0.575    | 2.342    | 2.850    | 148.90  |

Symmetry codes: (i)  $x, y, z+1$ ; (ii)  $x+1, y-1, z$ ; (iii)  $x-1, y+1, z$ ; (iv)  $x+1, -y+1/2, z-1/2$ ; (v)  $-x+1, -y+1, -z+1$ ; (vi)  $-x+1, -y, -z+1$ ; (vii)  $-x+1/2, y-1/2, z$ ; (viii)  $x+1/2, -y+3/2, -z+1$ ; (ix)  $x+1/2, y, -z+1/2$ ; (x)  $-x+1, y-1/2, -z+1/2$ ; (xi)  $-x+1, -y+2, -z+1$ ; (xii)  $x, y+1, z$ ; (xiii)  $x+1, y, z$ ; (xiv)  $-x+1, y+1/2, -z+1/2$ ; (xv)  $x+1, -y+3/2, z-1/2$ ; (xvi)  $-x+2, -y+1, -z$ ; (xvii)  $x-1, y, z$ .

### 3. Bond lengths (Å) and angles (°) for **1**, **3**, **4** and **5**

**Table S5** Selected bond lengths (Å) and angles (°) for **1**

| <b>Complex1</b>        |            |                                       |           |
|------------------------|------------|---------------------------------------|-----------|
| O1N5                   | 1.239(3)   | N8C6                                  | 1.431(3)  |
| O1Na2                  | 2.474(2)   | O5N7                                  | 1.229(3)  |
| O2N5                   | 1.226(3)   | O5Na2 <sup>ii</sup>                   | 2.629(2)  |
| N4C4                   | 1.341(3)   | N7C5                                  | 1.447(3)  |
| N4C6                   | 1.351(3)   | C3C2                                  | 1.393(3)  |
| N1C2                   | 1.353(3)   | C3N6                                  | 1.446(3)  |
| N1C1                   | 1.347(3)   | O8Na2 <sup>iii</sup>                  | 2.777(2)  |
| N1Na2                  | 2.626(2)   | C4C1                                  | 1.465(4)  |
| N5C2                   | 1.431(3)   | C5C6                                  | 1.394(3)  |
| N2C3                   | 1.335(3)   | O3N6                                  | 1.220(3)  |
| N2C1                   | 1.356(3)   | O3Na1 <sup>iv</sup>                   | 2.574(2)  |
| N2Na1                  | 2.519(2)   | N6O4                                  | 1.235(3)  |
| N3C4                   | 1.349(3)   | O4Na2 <sup>v</sup>                    | 2.564(2)  |
| N3C5                   | 1.347(3)   | Na1Na2 <sup>vi</sup>                  | 3.842(2)  |
| N3Na1                  | 2.476(2)   | Na1Na2 <sup>v</sup>                   | 3.740(2)  |
| O6N7                   | 1.219(3)   | Na1O9 <sup>vi</sup>                   | 2.374(2)  |
| O6Na1 <sup>i</sup>     | 2.479(2)   | Na1O10                                | 2.338(2)  |
| N8O8                   | 1.223(3)   | Na2O9                                 | 2.343(2)  |
| N8O7                   | 1.212(3)   | Na2O10 <sup>v</sup>                   | 2.373(2)  |
| O1N5C2                 | 118.0(2)   | O9 <sup>vi</sup> Na1N2                | 82.17(8)  |
| O2N5O1                 | 123.2(2)   | O9 <sup>vi</sup> Na1N3                | 93.05(8)  |
| O2N5C2                 | 118.8(2)   | O9 <sup>vi</sup> Na1O6 <sup>i</sup>   | 100.92(9) |
| C3N2C1                 | 102.7(2)   | O9 <sup>vi</sup> Na1O3 <sup>iv</sup>  | 88.95(8)  |
| C3N2Na1                | 140.85(16) | O9 <sup>vi</sup> Na1Na2 <sup>v</sup>  | 133.97(7) |
| C1N2Na1                | 111.39(15) | O9 <sup>vi</sup> Na1Na2 <sup>vi</sup> | 35.19(5)  |
| C4N3Na1                | 112.90(15) | O10Na1N2                              | 94.22(8)  |
| C5N3C4                 | 102.5(2)   | O10Na1N3                              | 103.40(8) |
| C5N3Na1                | 141.58(16) | O10Na1O6 <sup>i</sup>                 | 83.42(8)  |
| N7O6Na1 <sup>i</sup>   | 116.36(16) | O10Na1O3 <sup>iv</sup>                | 73.21(8)  |
| O8N8C6                 | 118.0(2)   | O10Na1Na2 <sup>v</sup>                | 37.78(6)  |
| O7N8O8                 | 121.8(2)   | O10Na1Na2 <sup>vi</sup>               | 158.18(7) |
| O7N8C6                 | 120.2(2)   | O10Na1O9 <sup>vi</sup>                | 160.76(9) |
| N7O5Na2 <sup>ii</sup>  | 133.59(17) | O1Na2N1                               | 63.52(7)  |
| O6N7O5                 | 124.2(2)   | O1Na2O5 <sup>vii</sup>                | 69.06(7)  |
| O6N7C5                 | 118.6(2)   | O1Na2O8 <sup>iii</sup>                | 144.27(8) |
| O5N7C5                 | 117.2(2)   | O1Na2O4 <sup>v</sup>                  | 137.58(8) |
| N2C3C2                 | 109.8(2)   | O1Na2Na1 <sup>vi</sup>                | 106.11(6) |
| N2C3N6                 | 118.6(2)   | O1Na2Na1 <sup>v</sup>                 | 76.43(6)  |
| C2C3N6                 | 131.5(2)   | N1Na2O5 <sup>vii</sup>                | 111.11(8) |
| N8O8Na2 <sup>iii</sup> | 136.32(17) | N1Na2O8 <sup>iii</sup>                | 151.92(8) |
| N1C2N5                 | 119.9(2)   | N1Na2Na1 <sup>v</sup>                 | 104.06(6) |
| N1C2C3                 | 109.2(2)   | N1Na2Na1 <sup>vi</sup>                | 92.10(5)  |

|                                     |            |                                        |            |
|-------------------------------------|------------|----------------------------------------|------------|
| C3C2N5                              | 130.5(2)   | O5 <sup>vii</sup> Na2O8 <sup>iii</sup> | 84.96(7)   |
| N4C4N3                              | 116.2(2)   | O5 <sup>vii</sup> Na2Na1 <sup>v</sup>  | 110.04(6)  |
| N4C4C1                              | 122.8(2)   | O5 <sup>vii</sup> Na2Na1 <sup>vi</sup> | 57.07(5)   |
| N3C4C1                              | 121.0(2)   | O8 <sup>iii</sup> Na2Na1 <sup>vi</sup> | 77.20(6)   |
| N3C5N7                              | 118.8(2)   | O8 <sup>iii</sup> Na2Na1 <sup>v</sup>  | 90.80(6)   |
| N3C5C6                              | 109.4(2)   | O4 <sup>v</sup> Na2N1                  | 98.14(8)   |
| C6C5N7                              | 131.7(2)   | O4 <sup>v</sup> Na2O5 <sup>vii</sup>   | 148.72(7)  |
| N1C1N2                              | 115.8(2)   | O4 <sup>v</sup> Na2O8 <sup>iii</sup>   | 63.77(7)   |
| N1C1C4                              | 123.9(2)   | O4 <sup>v</sup> Na2Na1 <sup>v</sup>    | 71.53(6)   |
| N2C1C4                              | 120.3(2)   | O4 <sup>v</sup> Na2Na1 <sup>vi</sup>   | 112.81(6)  |
| N4C6N8                              | 119.4(2)   | Na1 <sup>v</sup> Na2Na1 <sup>vi</sup>  | 162.67(4)  |
| N4C6C5                              | 109.1(2)   | O9Na2O1                                | 132.74(8)  |
| C5C6N8                              | 131.3(2)   | O9Na2N1                                | 86.41(7)   |
| N6O3Na1 <sup>iv</sup>               | 124.44(16) | O9Na2O5 <sup>vii</sup>                 | 91.87(8)   |
| O3N6C3                              | 120.0(2)   | O9Na2O8 <sup>iii</sup>                 | 69.67(7)   |
| O3N6O4                              | 123.3(2)   | O9Na2O4 <sup>v</sup>                   | 78.76(8)   |
| O4N6C3                              | 116.7(2)   | O9Na2Na1 <sup>v</sup>                  | 149.53(7)  |
| N6O4Na2 <sup>v</sup>                | 125.46(15) | O9Na2Na1 <sup>vi</sup>                 | 35.74(6)   |
| N2Na1O3 <sup>iv</sup>               | 101.68(7)  | O9Na2O10 <sup>v</sup>                  | 143.24(9)  |
| N2Na1Na2 <sup>v</sup>               | 56.50(6)   | O10 <sup>v</sup> Na2O1                 | 75.02(8)   |
| N2Na1Na2 <sup>vi</sup>              | 106.60(6)  | O10 <sup>v</sup> Na2N1                 | 130.34(8)  |
| N3Na1N2                             | 69.39(7)   | O10 <sup>v</sup> Na2O5 <sup>vii</sup>  | 75.31(8)   |
| N3Na1O6 <sup>i</sup>                | 108.57(8)  | O10 <sup>v</sup> Na2O8 <sup>iii</sup>  | 74.91(7)   |
| N3Na1O3 <sup>iv</sup>               | 170.44(8)  | O10 <sup>v</sup> Na2O4 <sup>v</sup>    | 94.43(9)   |
| N3Na1Na2 <sup>vi</sup>              | 78.67(6)   | O10 <sup>v</sup> Na2Na1 <sup>v</sup>   | 37.12(6)   |
| N3Na1Na2 <sup>v</sup>               | 90.50(6)   | O10 <sup>v</sup> Na2Na1 <sup>vi</sup>  | 126.15(7)  |
| O6 <sup>i</sup> Na1N2               | 176.48(9)  | Na2O9Na1 <sup>vi</sup>                 | 109.06(10) |
| O6 <sup>i</sup> Na1O3 <sup>iv</sup> | 80.17(7)   | Na1O10Na2 <sup>v</sup>                 | 105.10(9)  |

(i) 1-x, 2-y, 2-z; (ii) x, y, 1+z; (iii) 1-x, 1-y, 1-z; (iv) -x, 3-y, 1-z; (v) -x, 2-y, 1-z; (vi) 1-x, 2-y, 1-z; (vii) x, y, -1+z

**Table S6** Selected bond lengths (Å) and angles (°) for **3**

| <b>Complex3</b>    |            |                       |            |
|--------------------|------------|-----------------------|------------|
| O3N4               | 1.230(2)   | N2C1                  | 1.352(3)   |
| O3Mg1 <sup>i</sup> | 2.6925(18) | N3C2                  | 1.429(3)   |
| O1N3               | 1.242(2)   | C3C2                  | 1.395(3)   |
| O1Mg1              | 2.5200(18) | C1C1 <sup>ii</sup>    | 1.455(4)   |
| O4N4               | 1.230(2)   | Mg1Mg1 <sup>iii</sup> | 3.4912(2)  |
| O2N3               | 1.226(2)   | Mg1Mg1 <sup>iv</sup>  | 3.4912(2)  |
| N4C3               | 1.435(3)   | Mg1O5                 | 2.3516(19) |
| N1C1               | 1.354(3)   | Mg1O5 <sup>iii</sup>  | 2.3357(19) |
| N1C2               | 1.348(3)   | Mg1O6                 | 2.4120(19) |
| N1Mg1              | 2.614(2)   | Mg1O6 <sup>iii</sup>  | 2.489(2)   |
| N2C3               | 1.335(3)   |                       |            |

|                                       |            |                                         |           |
|---------------------------------------|------------|-----------------------------------------|-----------|
| N4O3Mg1 <sup>i</sup>                  | 134.01(14) | Mg1 <sup>iv</sup> Mg1Mg1 <sup>iii</sup> | 180       |
| N3O1Mg1                               | 119.48(13) | O5 <sup>iii</sup> Mg1O3 <sup>v</sup>    | 70.49(7)  |
| O3N4C3                                | 118.40(18) | O5Mg1O3 <sup>v</sup>                    | 71.78(6)  |
| O4N4O3                                | 123.80(19) | O5Mg1O1                                 | 127.54(7) |
| O4N4C3                                | 117.78(18) | O5 <sup>iii</sup> Mg1O1                 | 122.18(7) |
| C1N1Mg1                               | 141.97(15) | O5 <sup>iii</sup> Mg1N1                 | 88.83(7)  |
| C2N1C1                                | 102.48(17) | O5Mg1N1                                 | 85.61(7)  |
| C2N1Mg1                               | 113.23(14) | O5 <sup>iii</sup> Mg1Mg1 <sup>iv</sup>  | 137.97(5) |
| C3N2C1                                | 103.36(17) | O5Mg1Mg1 <sup>iii</sup>                 | 138.32(5) |
| O1N3C2                                | 117.72(18) | O5 <sup>iii</sup> Mg1Mg1 <sup>iii</sup> | 42.03(5)  |
| O2N3O1                                | 123.14(19) | O5Mg1Mg1 <sup>iv</sup>                  | 41.68(5)  |
| O2N3C2                                | 119.11(18) | O5 <sup>iii</sup> Mg1O5                 | 96.29(7)  |
| N2C3N4                                | 119.01(19) | O5Mg1O6                                 | 79.83(7)  |
| N2C3C2                                | 109.24(18) | O5 <sup>iii</sup> Mg1O6                 | 150.49(8) |
| C2C3N4                                | 131.52(19) | O5Mg1O6 <sup>iii</sup>                  | 151.20(8) |
| N1C1C1 <sup>ii</sup>                  | 123.2(2)   | O5 <sup>iii</sup> Mg1O6 <sup>iii</sup>  | 78.55(6)  |
| N2C1N1                                | 115.34(18) | O6Mg1O3 <sup>v</sup>                    | 80.62(6)  |
| N2C1C1 <sup>ii</sup>                  | 121.5(2)   | O6 <sup>iii</sup> Mg1O3 <sup>v</sup>    | 79.87(6)  |
| N1C2N3                                | 120.03(19) | O6 <sup>iii</sup> Mg1O1                 | 76.74(7)  |
| N1C2C3                                | 109.56(18) | O6Mg1O1                                 | 80.89(7)  |
| C3C2N3                                | 129.9(2)   | O6 <sup>iii</sup> Mg1N1                 | 122.22(7) |
| O3 <sup>v</sup> Mg1Mg1 <sup>iv</sup>  | 90.73(4)   | O6Mg1N1                                 | 119.69(7) |
| O3 <sup>v</sup> Mg1Mg1 <sup>iii</sup> | 89.26(4)   | O6Mg1Mg1 <sup>iii</sup>                 | 134.52(5) |
| O1Mg1O3 <sup>v</sup>                  | 149.81(6)  | O6 <sup>iii</sup> Mg1Mg1 <sup>iii</sup> | 43.69(4)  |
| O1Mg1N1                               | 63.31(6)   | O6Mg1Mg1 <sup>iv</sup>                  | 45.48(5)  |
| O1Mg1Mg1 <sup>iv</sup>                | 93.10(5)   | O6 <sup>iii</sup> Mg1Mg1 <sup>iv</sup>  | 136.31(4) |
| O1Mg1Mg1 <sup>iii</sup>               | 86.90(5)   | O6Mg1O6 <sup>iii</sup>                  | 90.83(6)  |
| N1Mg1O3 <sup>v</sup>                  | 146.83(6)  | Mg1 <sup>iv</sup> O5Mg1                 | 96.29(7)  |
| N1Mg1Mg1 <sup>iv</sup>                | 87.82(4)   | Mg1O6Mg1 <sup>iv</sup>                  | 90.83(6)  |
| N1Mg1Mg1 <sup>iii</sup>               | 92.18(4)   |                                         |           |

(i) x, 0.5-y, 0.5+z; (ii) 1-x, 1-y, 1-z; (iii) -1+x, y, z; (iv) 1+x, y, z; (v) x, 0.5-y, -0.5+z.

**Table S7** Selected bond lengths (Å) and angles (°) for **4**

| <b>Complex4</b> |           |      |          |
|-----------------|-----------|------|----------|
| Ca1O13          | 2.477(6)  | N4C4 | 1.347(5) |
| Ca1O14          | 2.445(15) | N4C6 | 1.342(5) |
| Ca1O11          | 2.367(3)  | N3C4 | 1.350(5) |
| Ca1O10          | 2.391(3)  | N3C5 | 1.352(5) |
| Ca1O12          | 2.401(3)  | N2C1 | 1.342(5) |
| Ca1O9           | 2.361(3)  | N2C3 | 1.353(4) |
| Ca1N4           | 2.525(3)  | N1C1 | 1.349(5) |
| Ca1N1           | 2.584(3)  | N1C2 | 1.341(4) |
| O8N8            | 1.228(4)  | N8C6 | 1.442(5) |
| O7N8            | 1.224(4)  | N7C5 | 1.438(5) |

|           |            |         |          |
|-----------|------------|---------|----------|
| O6N7      | 1.227(4)   | N6C3    | 1.431(5) |
| O5N7      | 1.231(4)   | N5C2    | 1.435(5) |
| O4N6      | 1.234(4)   | C4C1    | 1.458(5) |
| O3N6      | 1.230(4)   | C6C5    | 1.383(5) |
| O2N5      | 1.237(4)   | C3C2    | 1.391(5) |
| O1N5      | 1.227(4)   |         |          |
| O13Ca1N4  | 105.1(2)   | C2N1Ca1 | 137.3(3) |
| O13Ca1N1  | 72.12(14)  | C2N1C1  | 103.4(3) |
| O14Ca1N4  | 89.3(8)    | O8N8C6  | 118.1(3) |
| O14Ca1N1  | 75.2(4)    | O7N8O8  | 123.0(4) |
| O11Ca1O13 | 70.8(3)    | O7N8C6  | 118.9(4) |
| O11Ca1O14 | 87.8(8)    | O6N7O5  | 123.9(3) |
| O11Ca1O10 | 75.16(10)  | O6N7C5  | 118.6(4) |
| O11Ca1O12 | 104.99(11) | O5N7C5  | 117.5(3) |
| O11Ca1N4  | 173.59(10) | O4N6C3  | 117.8(3) |
| O11Ca1N1  | 109.38(10) | O3N6O4  | 124.0(3) |
| O10Ca1O13 | 127.26(14) | O3N6C3  | 118.2(4) |
| O10Ca1O14 | 125.6(5)   | O2N5C2  | 117.9(4) |
| O10Ca1O12 | 76.44(11)  | O1N5O2  | 123.9(3) |
| O10Ca1N4  | 111.14(10) | O1N5C2  | 118.2(3) |
| O10Ca1N1  | 159.24(10) | N4C4C1  | 117.4(4) |
| O12Ca1O13 | 75.0(3)    | N3C4N4  | 116.2(3) |
| O12Ca1O14 | 58.6(9)    | N3C4C1  | 126.3(4) |
| O12Ca1N4  | 78.24(11)  | N4C6N8  | 118.1(4) |
| O12Ca1N1  | 120.00(11) | N4C6C5  | 109.2(3) |
| O9Ca1O13  | 133.8(3)   | C5C6N8  | 132.7(4) |
| O9Ca1O14  | 149.8(8)   | N3C5N7  | 119.7(4) |
| O9Ca1O11  | 86.43(11)  | N3C5C6  | 110.2(3) |
| O9Ca1O10  | 81.19(10)  | C6C5N7  | 130.1(3) |
| O9Ca1O12  | 151.09(12) | N2C1N1  | 115.6(3) |
| O9Ca1N4   | 93.26(11)  | N2C1C4  | 126.1(4) |
| O9Ca1N1   | 78.94(10)  | N1C1C4  | 118.4(4) |
| N4Ca1N1   | 64.32(10)  | N2C3N6  | 119.3(4) |
| C4N4Ca1   | 118.2(2)   | N2C3C2  | 109.5(3) |
| C6N4Ca1   | 134.3(3)   | C2C3N6  | 130.8(4) |
| C6N4C4    | 102.8(3)   | N1C2N5  | 118.9(4) |
| C4N3C5    | 101.6(3)   | N1C2C3  | 108.9(3) |
| C1N2C3    | 102.6(3)   | C3C2N5  | 132.1(4) |
| C1N1Ca1   | 116.0(2)   |         |          |

**Table S8** Selected bond lengths (Å) and angles (°) for **5**

| <b>Complex5</b>      |          |      |          |
|----------------------|----------|------|----------|
| Ba1O1                | 3.062(3) | O8N8 | 1.235(5) |
| Ba1O11 <sup>ii</sup> | 2.813(4) | O3N6 | 1.219(5) |

|                                         |            |                        |           |
|-----------------------------------------|------------|------------------------|-----------|
| Ba1O11 <sup>iii</sup>                   | 2.839(4)   | O5N7                   | 1.240(5)  |
| Ba1O2 <sup>iv</sup>                     | 3.029(3)   | O7N8                   | 1.223(5)  |
| Ba1O4 <sup>iii</sup>                    | 3.010(3)   | N3C4                   | 1.346(5)  |
| Ba1N1                                   | 2.815(3)   | N3C5                   | 1.348(6)  |
| Ba1O10                                  | 2.748(3)   | N6C3                   | 1.429(6)  |
| Ba1O9                                   | 2.740(3)   | N7C5                   | 1.425(6)  |
| Ba1N2 <sup>iii</sup>                    | 3.141(3)   | N8C6                   | 1.425(5)  |
| Ba1N4                                   | 3.061(4)   | N5C2                   | 1.439(5)  |
| O1N5                                    | 1.240(4)   | N2C3                   | 1.343(5)  |
| O2N5                                    | 1.217(5)   | N2C1                   | 1.339(5)  |
| O4N6                                    | 1.255(5)   | N4C6                   | 1.354(5)  |
| O6N7                                    | 1.221(5)   | N4C4                   | 1.341(5)  |
| N1C2                                    | 1.337(5)   | C3C2                   | 1.403(6)  |
| N1C1                                    | 1.346(5)   | C6C5                   | 1.399(6)  |
| C4C1                                    | 1.457(6)   |                        |           |
| O1Ba1N2 <sup>iii</sup>                  | 102.70(8)  | O9Ba1N4                | 90.03(10) |
| O11 <sup>ii</sup> Ba1O1                 | 80.08(10)  | N4Ba1O1                | 108.89(9) |
| O11 <sup>iii</sup> Ba1O1                | 144.06(10) | N4Ba1N2 <sup>iii</sup> | 145.25(9) |
| O11 <sup>ii</sup> Ba1O11 <sup>iii</sup> | 64.88(13)  | N5O1Ba1                | 124.7(2)  |
| O11 <sup>iii</sup> Ba1O2 <sup>iv</sup>  | 130.70(11) | N5O2Ba1 <sup>vi</sup>  | 123.7(2)  |
| O11 <sup>ii</sup> Ba1O2 <sup>iv</sup>   | 129.97(10) | N6O4Ba1 <sup>v</sup>   | 113.5(2)  |
| O11 <sup>ii</sup> Ba1O4 <sup>iii</sup>  | 68.03(11)  | C2N1Ba1                | 130.1(3)  |
| O11 <sup>iii</sup> Ba1O4 <sup>iii</sup> | 101.73(11) | C2N1C1                 | 103.7(3)  |
| O11 <sup>ii</sup> Ba1N1                 | 69.89(11)  | C1N1Ba1                | 126.1(3)  |
| O11 <sup>iii</sup> Ba1N2 <sup>iii</sup> | 72.73(11)  | C4N3C5                 | 103.2(4)  |
| O11 <sup>ii</sup> Ba1N2 <sup>iii</sup>  | 92.85(11)  | O4N6C3                 | 116.6(4)  |
| O11 <sup>ii</sup> Ba1N4                 | 78.95(11)  | O3N6O4                 | 123.7(4)  |
| O11 <sup>iii</sup> Ba1N4                | 73.23(11)  | O3N6C3                 | 119.7(4)  |
| O2 <sup>iv</sup> Ba1Ba1 <sup>i</sup>    | 140.08(6)  | O6N7O5                 | 123.1(4)  |
| O2 <sup>iv</sup> Ba1O1                  | 78.01(9)   | O6N7C5                 | 119.1(4)  |
| O2 <sup>iv</sup> Ba1N2 <sup>iii</sup>   | 135.65(9)  | O5N7C5                 | 117.5(4)  |
| O2 <sup>iv</sup> Ba1N4                  | 66.83(9)   | O8N8C6                 | 118.7(4)  |
| O4 <sup>iii</sup> Ba1Ba1 <sup>i</sup>   | 84.28(6)   | O7N8O8                 | 122.4(4)  |
| O4 <sup>iii</sup> Ba1O1                 | 55.12(8)   | O7N8C6                 | 118.9(4)  |
| O4 <sup>iii</sup> Ba1O2 <sup>iv</sup>   | 127.56(9)  | O1N5C2                 | 116.0(3)  |
| O4 <sup>iii</sup> Ba1N2 <sup>iii</sup>  | 51.45(9)   | O2N5O1                 | 123.2(4)  |
| O4 <sup>iii</sup> Ba1N4                 | 144.92(9)  | O2N5C2                 | 120.8(4)  |
| N1Ba1Ba1 <sup>i</sup>                   | 93.93(8)   | C3N2Ba1 <sup>v</sup>   | 111.1(3)  |
| N1Ba1O1                                 | 52.10(9)   | C1N2Ba1 <sup>v</sup>   | 140.3(3)  |
| N1Ba1O11 <sup>iii</sup>                 | 117.12(11) | C1N2C3                 | 102.8(3)  |
| N1Ba1O2 <sup>iv</sup>                   | 61.11(9)   | C6N4Ba1                | 139.6(3)  |
| N1Ba1O4 <sup>iii</sup>                  | 99.23(9)   | C4N4Ba1                | 116.0(3)  |
| N1Ba1N2 <sup>iii</sup>                  | 150.54(9)  | C4N4C6                 | 103.1(3)  |
| N1Ba1N4                                 | 56.84(10)  | N2C3N6                 | 119.4(4)  |



|                          |            |        |          |
|--------------------------|------------|--------|----------|
| O10Ba1O1                 | 58.98(9)   | C2C3N6 | 130.9(4) |
| O10Ba1O11 <sup>ii</sup>  | 129.64(10) | N4C6N8 | 121.6(4) |
| O10Ba1O11 <sup>iii</sup> | 141.59(11) | N4C6C5 | 108.9(4) |
| O10Ba1O2 <sup>iv</sup>   | 71.81(9)   | C5C6N8 | 129.0(4) |
| O10Ba1O4 <sup>iii</sup>  | 64.88(9)   | N1C2N5 | 117.0(4) |
| O10Ba1N1                 | 100.9(1)   | N1C2C3 | 108.3(4) |
| O10Ba1N2 <sup>iii</sup>  | 71.28(9)   | C3C2N5 | 134.6(4) |
| O10Ba1N4                 | 138.59(9)  | N3C4C1 | 123.1(4) |
| O9Ba1Ba1i                | 105.63(7)  | N4C4N3 | 115.8(4) |
| O9Ba1O1                  | 140.94(9)  | N4C4C1 | 121.2(4) |
| O9Ba1O11 <sup>ii</sup>   | 138.23(10) | N3C5N7 | 120.1(4) |
| O9Ba1O11 <sup>iii</sup>  | 73.36(10)  | N3C5C6 | 109.0(4) |
| O9Ba1O2 <sup>iv</sup>    | 78.84(9)   | C6C5N7 | 130.8(4) |
| O9Ba1O4 <sup>iii</sup>   | 122.47(10) | N1C1C4 | 119.0(4) |
| O9Ba1N1                  | 134.91(10) | N2C1N1 | 115.7(4) |
| O9Ba1O10                 | 84.03(10)  | N2C1C4 | 125.4(4) |
| O9Ba1N2 <sup>iii</sup>   | 73.71(10)  |        |          |

(i) 2-x, 1-y, 1-z; (ii) 1-x, 1-y, 1-z; (iii) 1+x, y, z; (iv) x, 1.5-y, -0.5+z; (v) -1+x, y, z; (vi) x, 1.5-y, 0.5+z.

#### 4. Composition of detonation products of complexes 1, 3, 4 and 5

**Table S9.** Composition of detonation products of complex 1

| Products                            | mol/mol  | mol/kg   | Mol %   |
|-------------------------------------|----------|----------|---------|
| N <sub>2</sub>                      | 3.99E+00 | 1.01E+01 | 34.9533 |
| CO <sub>2</sub>                     | 2.00E+00 | 5.07E+00 | 17.4928 |
| C(d)                                | 1.96E+00 | 4.98E+00 | 17.1638 |
| H <sub>2</sub> O                    | 1.41E+00 | 3.58E+00 | 12.3389 |
| Na <sub>2</sub> CO <sub>3</sub> (s) | 1.00E+00 | 2.54E+00 | 8.753   |
| CH <sub>2</sub> O <sub>2</sub>      | 5.57E-01 | 1.41E+00 | 4.8762  |
| CO                                  | 4.79E-01 | 1.22E+00 | 4.1941  |
| NH <sub>3</sub>                     | 1.15E-02 | 2.93E-02 | 0.101   |
| H <sub>2</sub>                      | 1.03E-02 | 2.61E-02 | 0.0901  |
| CH <sub>4</sub>                     | 2.08E-03 | 5.29E-03 | 0.0182  |
| HCN                                 | 1.89E-03 | 4.79E-03 | 0.0165  |
| C <sub>2</sub> H <sub>6</sub>       | 9.78E-05 | 2.48E-04 | 0.0009  |
| C <sub>2</sub> H <sub>4</sub>       | 8.79E-05 | 2.23E-04 | 0.0008  |
| CH <sub>3</sub> OH                  | 2.83E-05 | 7.17E-05 | 0.0002  |
| NO                                  | 5.75E-06 | 1.46E-05 | 0.0001  |
| N <sub>2</sub> H <sub>4</sub>       | 3.41E-06 | 8.66E-06 | 0       |
| H                                   | 2.42E-06 | 6.13E-06 | 0       |
| NH <sub>2</sub>                     | 2.34E-06 | 5.95E-06 | 0       |
| CH <sub>2</sub> O                   | 9.25E-07 | 2.35E-06 | 0       |
| OH                                  | 6.57E-07 | 1.67E-06 | 0       |
| CHNO                                | 5.11E-07 | 1.30E-06 | 0       |

|                                     |          |          |   |
|-------------------------------------|----------|----------|---|
| CNO                                 | 5.11E-07 | 1.30E-06 | 0 |
| O <sub>2</sub>                      | 2.02E-07 | 5.12E-07 | 0 |
| O                                   | 1.02E-07 | 2.58E-07 | 0 |
| NO <sub>2</sub>                     | 9.34E-09 | 2.37E-08 | 0 |
| N <sub>2</sub> O                    | 8.36E-09 | 2.12E-08 | 0 |
| N                                   | 7.47E-09 | 1.90E-08 | 0 |
| C(gr)                               | 2.75E-10 | 6.98E-10 | 0 |
| Na <sub>2</sub> CO <sub>3</sub> (l) | 7.37E-11 | 1.87E-10 | 0 |
| NaOH(l)                             | 8.75E-12 | 2.22E-11 | 0 |
| Na                                  | 7.13E-12 | 1.81E-11 | 0 |
| NaOH(s)                             | 4.25E-12 | 1.08E-11 | 0 |
| NaOH                                | 1.74E-17 | 4.41E-17 | 0 |
| Na <sub>2</sub> O(l)                | 5.14E-18 | 1.30E-17 | 0 |
| Na(s)                               | 3.73E-18 | 9.47E-18 | 0 |
| Na(l)                               | 3.59E-18 | 9.11E-18 | 0 |
| NaO                                 | 9.41E-19 | 2.39E-18 | 0 |
| Na <sub>2</sub> O(s)                | 7.85E-19 | 1.99E-18 | 0 |

**Table S10.** Composition of detonation products of complex **3**

| Products                       | mol/mol  | mol/kg   | Mol %   |
|--------------------------------|----------|----------|---------|
| N <sub>2</sub>                 | 1.99E+00 | 9.20E+00 | 26.2485 |
| H <sub>2</sub> O               | 1.57E+00 | 7.23E+00 | 20.6305 |
| CO <sub>2</sub>                | 1.22E+00 | 5.63E+00 | 16.0594 |
| C(d)                           | 1.15E+00 | 5.32E+00 | 15.1834 |
| MgO(s)                         | 1.00E+00 | 4.62E+00 | 13.1812 |
| CH <sub>2</sub> O <sub>2</sub> | 3.78E-01 | 1.75E+00 | 4.9846  |
| CO                             | 2.42E-01 | 1.12E+00 | 3.1866  |
| NH <sub>3</sub>                | 1.65E-02 | 7.63E-02 | 0.2176  |
| H <sub>2</sub>                 | 1.43E-02 | 6.59E-02 | 0.1879  |
| CH <sub>4</sub>                | 7.62E-03 | 3.52E-02 | 0.1005  |
| HCN                            | 7.46E-04 | 3.45E-03 | 0.0098  |
| C <sub>2</sub> H <sub>6</sub>  | 5.48E-04 | 2.53E-03 | 0.0072  |
| C <sub>2</sub> H <sub>4</sub>  | 1.53E-04 | 7.06E-04 | 0.002   |
| CH <sub>3</sub> OH             | 4.86E-05 | 2.24E-04 | 0.0006  |
| N <sub>2</sub> H <sub>4</sub>  | 1.57E-06 | 7.25E-06 | 0       |
| CH <sub>2</sub> O              | 7.63E-07 | 3.53E-06 | 0       |
| NH <sub>2</sub>                | 7.15E-07 | 3.30E-06 | 0       |
| H                              | 6.67E-07 | 3.08E-06 | 0       |
| NO                             | 4.79E-07 | 2.21E-06 | 0       |
| CHNO                           | 2.30E-07 | 1.06E-06 | 0       |
| OH                             | 1.36E-07 | 6.28E-07 | 0       |
| CNO                            | 3.00E-08 | 1.39E-07 | 0       |
| O <sub>2</sub>                 | 8.46E-09 | 3.91E-08 | 0       |
| O                              | 3.88E-09 | 1.79E-08 | 0       |

|                         |          |          |   |
|-------------------------|----------|----------|---|
| N <sub>2</sub> O        | 5.30E-10 | 2.45E-09 | 0 |
| C(gr)                   | 3.71E-10 | 1.71E-09 | 0 |
| N                       | 2.30E-10 | 1.06E-09 | 0 |
| NO <sub>2</sub>         | 2.24E-10 | 1.04E-09 | 0 |
| Mg(OH) <sub>2</sub> (s) | 3.12E-11 | 1.44E-10 | 0 |
| Mg                      | 4.41E-15 | 2.04E-14 | 0 |
| MgOH                    | 6.49E-19 | 3.00E-18 | 0 |
| MgO                     | 4.89E-20 | 2.26E-19 | 0 |
| Mg(s)                   | 1.77E-20 | 8.18E-20 | 0 |
| Mg(l)                   | 5.18E-21 | 2.39E-20 | 0 |
| MgO(l)                  | 1.13E-21 | 5.21E-21 | 0 |

**Table S11.** Composition of detonation products of complex 4

| Products                       | mol/mol  | mol/kg   | Mol %   |
|--------------------------------|----------|----------|---------|
| H <sub>2</sub> O               | 6.06E+00 | 1.26E+01 | 35.4285 |
| N <sub>2</sub>                 | 3.97E+00 | 8.26E+00 | 23.21   |
| CO <sub>2</sub>                | 2.23E+00 | 4.64E+00 | 13.0326 |
| C(d)                           | 1.94E+00 | 4.04E+00 | 11.3531 |
| CH <sub>2</sub> O <sub>2</sub> | 1.72E+00 | 3.57E+00 | 10.0398 |
| CaO(l)                         | 1.00E+00 | 2.08E+00 | 5.8487  |
| NH <sub>3</sub>                | 6.32E-02 | 1.31E-01 | 0.3694  |
| CO                             | 5.27E-02 | 1.10E-01 | 0.3083  |
| CH <sub>4</sub>                | 4.85E-02 | 1.01E-01 | 0.2838  |
| H <sub>2</sub>                 | 1.51E-02 | 3.14E-02 | 0.0883  |
| C <sub>2</sub> H <sub>6</sub>  | 6.26E-03 | 1.30E-02 | 0.0366  |
| C <sub>2</sub> H <sub>4</sub>  | 7.57E-05 | 1.58E-04 | 0.0004  |
| CH <sub>3</sub> OH             | 5.54E-05 | 1.15E-04 | 0.0003  |
| HCN                            | 5.21E-05 | 1.08E-04 | 0.0003  |
| CaO(s)                         | 6.62E-06 | 1.38E-05 | 0       |
| N <sub>2</sub> H <sub>4</sub>  | 1.22E-06 | 2.54E-06 | 0       |
| NH <sub>2</sub>                | 2.25E-08 | 4.68E-08 | 0       |
| CH <sub>2</sub> O              | 1.96E-08 | 4.08E-08 | 0       |
| H                              | 7.43E-09 | 1.55E-08 | 0       |
| NO                             | 2.94E-09 | 6.12E-09 | 0       |
| CHNO                           | 2.18E-09 | 4.54E-09 | 0       |
| OH                             | 8.88E-10 | 1.85E-09 | 0       |
| C(gr)                          | 1.32E-10 | 2.74E-10 | 0       |
| CNO                            | 3.89E-11 | 8.11E-11 | 0       |
| O <sub>2</sub>                 | 2.44E-11 | 5.09E-11 | 0       |
| O                              | 3.63E-12 | 7.55E-12 | 0       |
| N <sub>2</sub> O               | 1.37E-12 | 2.85E-12 | 0       |
| NO <sub>2</sub>                | 3.83E-13 | 7.98E-13 | 0       |
| N                              | 9.20E-14 | 1.91E-13 | 0       |
| Ca                             | 7.96E-20 | 1.66E-19 | 0       |

**Table S12.** Composition of detonation products of complex **5**

| Products         | mol/mol  | mol/kg   | Mol %   |
|------------------|----------|----------|---------|
| N <sub>2</sub>   | 4.00E+00 | 7.94E+00 | 28.5701 |
| H <sub>2</sub> O | 2.99E+00 | 5.93E+00 | 21.3212 |
| CO <sub>2</sub>  | 2.97E+00 | 5.89E+00 | 21.1797 |
| C(d)             | 1.95E+00 | 3.87E+00 | 13.9325 |
| CO               | 1.08E+00 | 2.15E+00 | 7.7443  |
| BaO(s)           | 1.00E+00 | 1.99E+00 | 7.1428  |
| H <sub>2</sub>   | 1.49E-02 | 2.97E-02 | 0.1067  |
| NO               | 2.19E-04 | 4.36E-04 | 0.0016  |
| O <sub>2</sub>   | 4.88E-05 | 9.69E-05 | 0.0003  |
| H                | 3.86E-05 | 7.67E-05 | 0.0003  |
| O                | 3.55E-05 | 7.05E-05 | 0.0003  |
| NH <sub>2</sub>  | 2.65E-05 | 5.26E-05 | 0.0002  |
| OH               | 1.35E-05 | 2.67E-05 | 0.0001  |
| NO <sub>2</sub>  | 3.24E-06 | 6.43E-06 | 0       |
| N                | 2.31E-06 | 4.59E-06 | 0       |
| N <sub>2</sub> O | 2.47E-07 | 4.91E-07 | 0       |
| Ba               | 2.80E-10 | 5.56E-10 | 0       |
| BaO(l)           | 1.85E-10 | 3.68E-10 | 0       |

### 5. Snap shots of laser initiation experiments

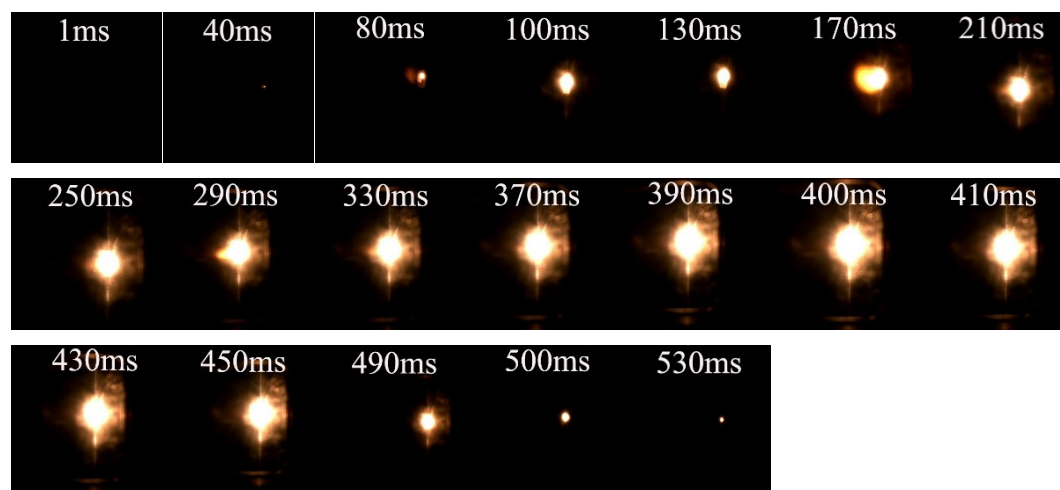Figure S1. Snap shots of the laser initiation process of **TNBI**.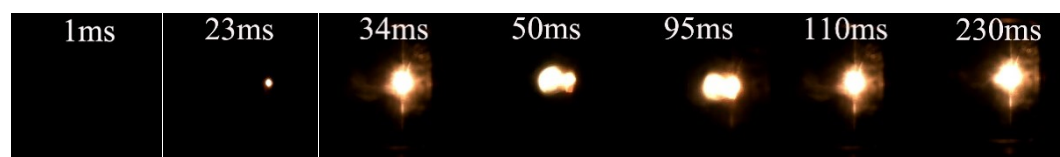

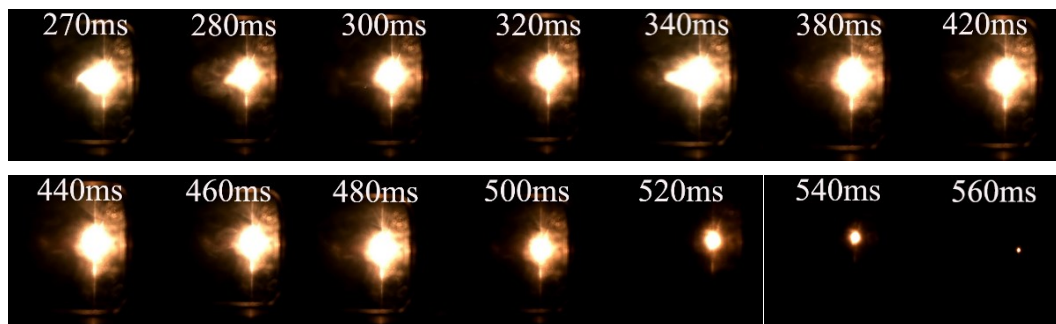

Figure S2. Snap shots of the laser initiation process of complex 2.

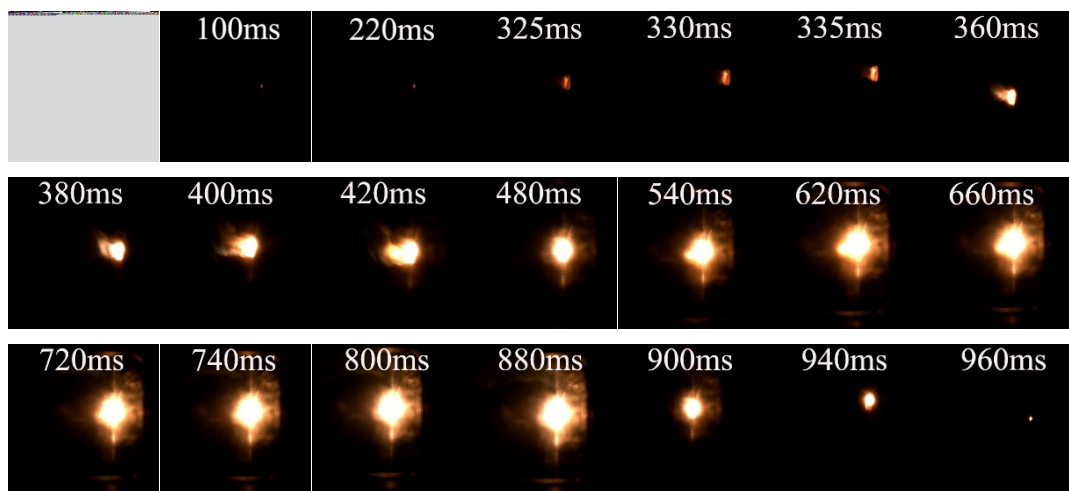

Figure S3. Snap shots of the laser initiation process of complex 3.

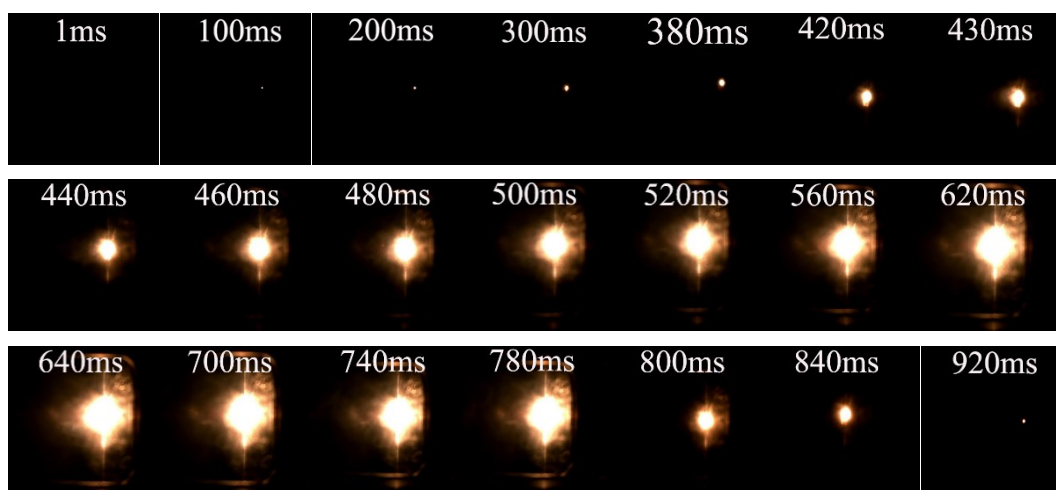

Figure S4. Snap shots of the laser initiation process of complex 4.

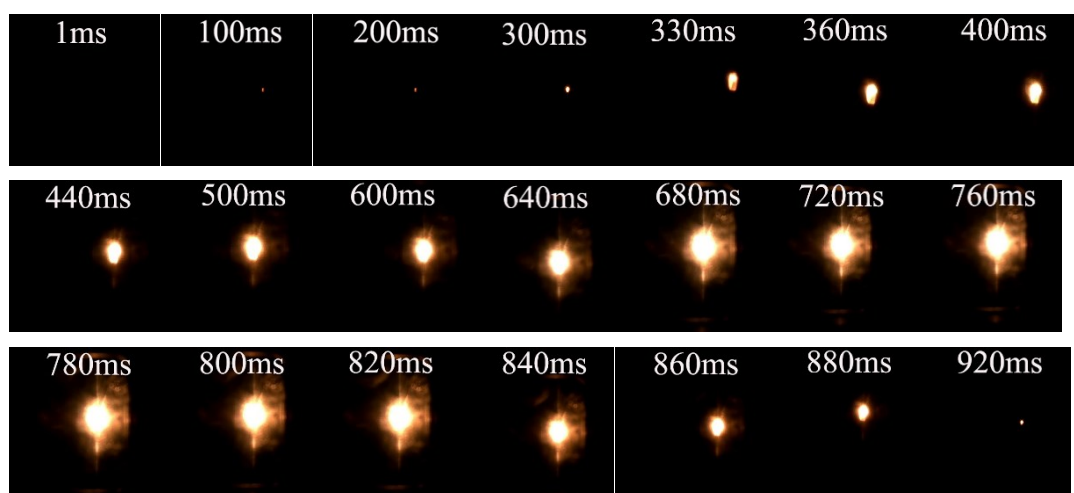

Figure S5. Snap shots of the laser initiation process of complex 5.

## 6. Detailed calculation of enthalpies of formation.

**Table S13.** Detailed calculation of enthalpies of formation of complexes 1, 3, 4, and 5

|           | Calc. Density (g/cm <sup>3</sup> ) | Formula sum      | Q <sub>v</sub> (kJ/mol) |
|-----------|------------------------------------|------------------|-------------------------|
| Complex 1 | 1.972                              | C6 H4 N8 Na2 O10 | 2296.636                |
| Complex 3 | 1.890                              | C3 H4 Mg N4 O6   | 1345.988                |
| Complex 4 | 1.814                              | C6 H16 Ca N8 O15 | 2547.710                |
| Complex 5 | 2.411                              | C6 H6 Ba N8 O11  | 3241.980                |

|                                                                                                                                                                                  | n <sub>s</sub> -n <sub>0</sub> | Δ <sub>c</sub> H (kJ/mol) | Δ <sub>f</sub> H |
|----------------------------------------------------------------------------------------------------------------------------------------------------------------------------------|--------------------------------|---------------------------|------------------|
| Na <sub>2</sub> C <sub>6</sub> H <sub>4</sub> N <sub>8</sub> O <sub>10</sub> + 2.5O <sub>2</sub> =<br>2H <sub>2</sub> O+ 6 CO <sub>2</sub> +4N <sub>2</sub> + 1Na <sub>2</sub> O | 7.5                            | 2315.218232               | 383.207          |
| Mg C <sub>3</sub> H <sub>4</sub> N <sub>4</sub> O <sub>6</sub> + 1.5O <sub>2</sub> =<br>2H <sub>2</sub> O+ 3CO <sub>2</sub> +2N <sub>2</sub> +MgO                                | 3.5                            | 1354.660389               | -149.831         |
| Ca C <sub>6</sub> H <sub>16</sub> N <sub>8</sub> O <sub>15</sub> + 3O <sub>2</sub> =<br>8H <sub>2</sub> O+ 6CO <sub>2</sub> +4N <sub>2</sub> + CaO                               | 7                              | 2565.053456               | -1019.89         |
| Ba C <sub>6</sub> H <sub>6</sub> N <sub>8</sub> O <sub>11</sub> + 2.5O <sub>2</sub> =<br>3H <sub>2</sub> O + 6CO <sub>2</sub> + 4N <sub>2</sub> + BaO                            | 7.5                            | 3260.562421               | 908.813          |

$$\Delta_f H(\text{C}_6 \text{H}_4 \text{N}_8 \text{Na}_2 \text{O}_{10}, \text{s}) = 1\Delta_f H(\text{Na}_2 \text{O}, \text{s}) + 2\Delta_f H(\text{H}_2 \text{O}, \text{l}) + 5\Delta_f H(\text{CO}, \text{g}) + 1\Delta_f H(\text{CO}_2, \text{g}) + 4\Delta_f H(\text{N}_2, \text{g}) - \Delta_c H(\text{C}_6 \text{H}_4 \text{N}_8 \text{Na}_2 \text{O}_{10})$$

$$\Delta_f H(\text{C}_3 \text{H}_4 \text{Mg N}_4 \text{O}_6, \text{s}) = \Delta_f H(\text{MgO}, \text{s}) + 2\Delta_f H(\text{H}_2 \text{O}, \text{l}) + 3\Delta_f H(\text{CO}, \text{g}) + 2\Delta_f H(\text{N}_2, \text{g}) - \Delta_c H(\text{C}_3 \text{H}_4 \text{Mg N}_4 \text{O}_6)$$

$$\Delta_f H(\text{C}_6 \text{H}_{16} \text{Ca N}_8 \text{O}_{15}, \text{s}) = \Delta_f H(\text{CaO}, \text{s}) + 8\Delta_f H(\text{H}_2 \text{O}, \text{l}) + 6\Delta_f H(\text{CO}, \text{g}) + 4\Delta_f H(\text{N}_2, \text{g}) - \Delta_c H(\text{C}_6 \text{H}_{16} \text{Ca N}_8 \text{O}_{15})$$

$$\Delta_f H(\text{C}_6\text{H}_6\text{BaN}_8\text{O}_{11}, \text{s}) = \Delta_f H(\text{BaO}, \text{s}) + 3\Delta_f H(\text{H}_2\text{O}, \text{l}) + 5\Delta_f H(\text{CO}, \text{g}) + 1\Delta_f H(\text{CO}_2, \text{g}) + 4\Delta_f H(\text{N}_2, \text{g}) - \Delta_c H(\text{C}_6\text{H}_6\text{BaN}_8\text{O}_{11})$$

## 7. References.

- (1) T. W. Myers, J. A. Bjorgaard, K. E. Brown, D. E. Chavez, S. K. Hanson, R. J. Scharff, S. Tretiak, and J. M. Veauthier, Energetic Chromophores: Low-Energy Laser Initiation in Explosive Fe(II) Tetrazine Complexes. *J. Am. Chem. Soc.* 2016, **138**, 4685–4692.
- (2) T. W. Myers, K. E. Brown, D. E. Chavez, R. J. Scharff, and J. M. Veauthier, Laser Initiation of Fe(II) Complexes of 4-Nitropyrazolyl Substituted Tetrazine Ligands. *Inorg. Chem.* 2017, **56**, 2297–2303.
- (3) J. Evers, I. Gospodinov, M. Joas, T. M. Klapötke, and J. Stierstorfer, Cocrystallization of Photosensitive Energetic Copper(II) Perchlorate Complexes with the Nitrogen-rich Ligand 1,2-Di(1Htetrazol-5-yl)ethane. *Inorg. Chem.* 2014, **53**, 11749–11756.
- (4) M. Joas, T. M. Klapötke, and N. Szimhardt, *Chem. Eur. J.* 2013, **19**, 9995–10003.
- (6) G. Steinhauser, and T. M. Klapötke, *Angew. Chem. Int. Ed.* 2008, **47**, 3330–3347.
